# Supplementary material for: SARS-CoV-2 ORF6 protein does not antagonize interferon signaling in respiratory epithelial Calu-3 cells during infection
Source: PubMed Central journal article supplement (PMC10470815; doi:10.1128/mbio.01194-23), 2023-06-28

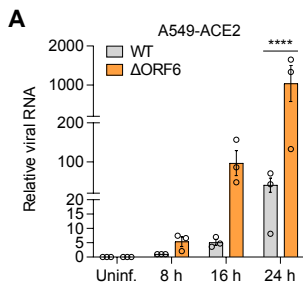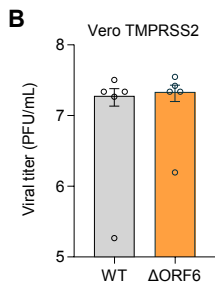

Supplement: mbio.01194-23-s0001.pdf [file mbio.01194-23-s0001.pdf]
