# Supplementary material for: SARS-CoV-2 ORF6 protein does not antagonize interferon signaling in respiratory epithelial Calu-3 cells during infection
Source: PubMed Central journal article supplement (PMC10470815; doi:10.1128/mbio.01194-23), 2023-06-28
Supplement: mbio.01194-23-s0002.pdf [file mbio.01194-23-s0002.pdf]

**FIG S1** Effect of ORF6 on SARS-CoV-2 infection. (A) A549-ACE2 cells were either uninfected (Uninf.) or infected with SARS-CoV-2 WT virus or  $\Delta$ ORF6 virus (MOI of 0.5) for 8, 16 or 24 hours. Viral RNA was analyzed by RT-qPCR. Viral RNA of WT virus at 8 hours was set to 1. Means  $\pm$  SEM for three independent experiments shown. Significance was calculated using two-way analysis of variance (ANOVA) and is indicated by \*\*\*\*P < 0.0001. (B) SARS-CoV-2 WT virus or  $\Delta$ ORF6 virus was titered on Vero TMPRSS2 cells. Shown is the means  $\pm$  SEM for four independent experiments.
